# Supplementary material for: Exploring Regorafenib Responsiveness and Uncovering Molecular Mechanisms in Recurrent Glioblastoma Tumors through Longitudinal In Vitro Sampling
Source: MDPI journal article supplement (doi:10.3390/cells13060487), 2024-03-11
Supplement: s1 [file s1]

**Supplementary Table S5.** Reactome pathways of Differentially Expressed Genes among Regorafenib treated and controls in Non Responders GB-EXPs samples.

| Pathway name                                            | Entities found | Entities Total | Entities ratio | Entities pValue | Entities FDR | Reactions found | Reactions total | Reactions ratio | Non Responders (treated vs ctrl) |
|---------------------------------------------------------|----------------|----------------|----------------|-----------------|--------------|-----------------|-----------------|-----------------|----------------------------------|
| Transcriptional Regulation by E2F6                      | 2              | 46             | 0.003          | 1.45E-04        | 7.22E-03     | 2               | 33              | 0.002           | ▲▲                               |
| Interconversion of nucleotide di- and triphosphates     | 1              | 80             | 0.005          | 1.45E-04        | 7.22E-03     | 2               | 33              | 0.002           | ▲▲                               |
| Metabolism of nucleotides                               | 1              | 256            | 0.017          | 1.45E-04        | 7.22E-03     | 2               | 142             | 0.01            | ▲▲                               |
| Metabolism                                              | 2              | 3.647          | 0.239          | 1.45E-04        | 7.22E-03     | 6               | 2.268           | 0.159           | ▼                                |
| Kinesins                                                | 2              | 68             | 0.004          | 2.90E-02        | 5.16E-01     | 3               | 14              | 0.001           | ▲                                |
| COPI-dependent Golgi-to-ER retrograde traffic           | 2              | 107            | 0.007          | 2.90E-02        | 5.16E-01     | 2               | 11              | 0.001           | ▲                                |
| Molybdenum cofactor biosynthesis                        | 1              | 27             | 0.002          | 2.90E-02        | 5.16E-01     | 1               | 6               | 0               | ▼                                |
| Golgi-to-ER retrograde transport                        | 2              | 148            | 0.01           | 2.90E-02        | 5.16E-01     | 2               | 18              | 0.001           | ▲                                |
| Intra-Golgi and retrograde Golgi-to-ER traffic          | 2              | 219            | 0.014          | 2.90E-02        | 5.16E-01     | 2               | 48              | 0.003           | ▲                                |
| Membrane Trafficking                                    | 2              | 668            | 0.044          | 2.90E-02        | 5.16E-01     | 2               | 219             | 0.015           | ▲                                |
| Vesicle-mediated transport                              | 2              | 828            | 0.054          | 2.90E-02        | 5.16E-01     | 2               | 252             | 0.018           | ▲                                |
| Metabolism of water-soluble vitamins and cofactors      | 1              | 258            | 0.017          | 2.90E-02        | 5.16E-01     | 1               | 143             | 0.01            | ▼                                |
| Metabolism of vitamins and cofactors                    | 1              | 382            | 0.025          | 2.90E-02        | 5.16E-01     | 1               | 205             | 0.014           | ▼                                |
| Polo-like kinase mediated events                        | 1              | 23             | 0.002          | 4.35E-02        | 6.01E-01     | 12              | 15              | 0.001           | ▲                                |
| G2/M Transition                                         | 2              | 212            | 0.014          | 4.35E-02        | 6.01E-01     | 26              | 78              | 0.005           | ▲                                |
| Mitotic G2-G2/M phases                                  | 2              | 214            | 0.014          | 4.35E-02        | 6.01E-01     | 26              | 80              | 0.006           | ▲                                |
| Cyclin A/B1/B2 associated events during G2/M transition | 1              | 32             | 0.002          | 4.35E-02        | 6.01E-01     | 2               | 25              | 0.002           | ▲                                |
