# Supplementary material for: Exploring Regorafenib Responsiveness and Uncovering Molecular Mechanisms in Recurrent Glioblastoma Tumors through Longitudinal In Vitro Sampling
Source: MDPI journal article supplement (doi:10.3390/cells13060487), 2024-03-11
Supplement: s1 [file s1]

**Supplementary Table S2.** Differentially Expressed Genes among Regorafenib treated and controls in Responders GB-EXPs samples.

| Gene         | BaseMean    | log2FoldChange | lfcSE       | stat         | pvalue      | padj        | Regulation |
|--------------|-------------|----------------|-------------|--------------|-------------|-------------|------------|
| DUSP6        | 1030.602564 | -2.035445528   | 0.295084956 | -6.89782887  | 5.28E-12    | 6.31E-08    | down       |
| SPRY4        | 1025.179366 | -1.478026206   | 0.29532205  | -5.004794626 | 5.59E-07    | 0.003342994 | down       |
| TIPARP       | 1485.264829 | -1.08733372    | 0.22733749  | -4.782905456 | 1.73E-06    | 0.006885835 | down       |
| PLVAP        | 374.1973502 | -3.343906939   | 0.711454307 | -4.700100774 | 2.60E-06    | 0.007772391 | down       |
| F3           | 1659.06811  | -1.83031619    | 0.39667464  | -4.614149743 | 3.95E-06    | 0.009438253 | down       |
| STC1         | 1068.707797 | -3.107891567   | 0.701243146 | -4.431974252 | 9.34E-06    | 0.01860636  | down       |
| NLRC3        | 307.7242286 | -1.342031415   | 0.309403705 | -4.337476881 | 1.44E-05    | 0.024617009 | down       |
| ESM1         | 354.0899544 | -2.848268339   | 0.661832088 | -4.30361173  | 1.68E-05    | 0.025112987 | down       |
| SEMA7A       | 576.6733932 | -2.007412305   | 0.475993701 | -4.21730855  | 2.47E-05    | 0.032843872 | down       |
| SLC30A2      | 27.04120244 | 2.607940852    | 0.625101515 | 4.172027728  | 3.02E-05    | NA          | up         |
| SERPINB2     | 9.381732009 | -6.584501841   | 1.606558547 | -4.098513469 | 4.16E-05    | NA          | down       |
| HMGCR        | 632.7932346 | -0.990838182   | 0.2434905   | -4.069309405 | 4.72E-05    | 0.049908631 | down       |
| PHLDA1       | 4306.481294 | -1.310959456   | 0.322990581 | -4.058816372 | 4.93E-05    | 0.049908631 | down       |
| RNF150       | 208.085889  | 1.08354345     | 0.267198793 | 4.0551959    | 5.01E-05    | 0.049908631 | up         |
| PKN1         | 2717.81574  | 0.752678426    | 0.192713147 | 3.905693198  | 9.40E-05    | 0.086410295 | up         |
| LRRC36       | 32.31731943 | -2.292724878   | 0.590940929 | -3.879786904 | 0.000104548 | NA          | down       |
| ANGPTL4      | 2115.89789  | -1.901486534   | 0.490842613 | -3.873923095 | 0.000107097 | 0.088282202 | down       |
| ELOVL6       | 228.9735214 | -0.916711606   | 0.237183323 | -3.864991827 | 0.000111093 | 0.088282202 | down       |
| EGR2         | 311.5887651 | -0.954647682   | 0.248228459 | -3.845843005 | 0.000120139 | 0.088282202 | down       |
| LRRC16B      | 240.334553  | 1.338450465    | 0.349002553 | 3.835073566  | 0.000125527 | 0.088282202 | up         |
| SRSF7        | 704.6769414 | -0.466772455   | 0.122238602 | -3.818535622 | 0.000134246 | 0.08916931  | no         |
| IL8          | 1156.482835 | -1.733954275   | 0.456649529 | -3.797122662 | 0.000146385 | 0.090037756 | down       |
| SPRY2        | 877.5602359 | -0.981474459   | 0.25896062  | -3.790052938 | 0.000150615 | 0.090037756 | down       |
| F2RL3        | 34.21939241 | -2.800868893   | 0.739860116 | -3.78567358  | 0.000153293 | NA          | down       |
| MFAP4        | 578.0008982 | 2.552818153    | 0.679762667 | 3.755455065  | 0.000173027 | 0.098509927 | up         |
| PXDNL        | 29.34698962 | -1.315393254   | 0.350541893 | -3.75245664  | 0.00017511  | NA          | down       |
| CNN1         | 43.6354944  | 1.546722655    | 0.41364811  | 3.739223314  | 0.00018459  | NA          | up         |
| HBEGF        | 404.0392227 | -0.697221523   | 0.186586813 | -3.736713825 | 0.000186441 | 0.101322159 | down       |
| EGFL7        | 734.0982389 | -1.978845734   | 0.532420474 | -3.716697292 | 0.000201844 | 0.102200272 | down       |
| ANGPT2       | 590.9991496 | -1.558032639   | 0.419662433 | -3.71258544  | 0.000205153 | 0.102200272 | down       |
| PTGS2        | 545.6326945 | -2.216381476   | 0.6000597   | -3.693601616 | 0.0002211   | 0.103370079 | down       |
| LPHN2        | 838.7193936 | -0.923627119   | 0.250346864 | -3.689389606 | 0.000224793 | 0.103370079 | down       |
| LIF          | 1401.853848 | -1.979614009   | 0.538176781 | -3.67837127  | 0.000234728 | 0.103941085 | down       |
| SLC1A1       | 151.5108207 | -1.18666296    | 0.32530571  | -3.647839326 | 0.000264455 | 0.112922253 | down       |
| RADIL        | 286.2457902 | 1.216666558    | 0.337625843 | 3.603594286  | 0.000313847 | 0.12939147  | up         |
| ELMSAN1      | 3222.752259 | 1.248463265    | 0.348761063 | 3.579709431  | 0.000343976 | 0.137086092 | up         |
| TXNIP        | 2910.060855 | -1.600517255   | 0.450399513 | -3.553550143 | 0.000380069 | 0.1456154   | down       |
| FLT1         | 1343.418986 | -2.100758216   | 0.592273788 | -3.546937682 | 0.000389737 | 0.1456154   | down       |
| TIMP1        | 3587.147659 | -2.166666219   | 0.612718344 | -3.536153669 | 0.000405998 | 0.147094471 | down       |
| COL2A1       | 37.75100552 | -3.216793486   | 0.916664829 | -3.509236293 | 0.000449395 | NA          | down       |
| NOTUM        | 48.80689011 | 2.645944532    | 0.759444475 | 3.484052646  | 0.000493882 | NA          | up         |
| SLC2A4RG     | 925.5863233 | 0.938749279    | 0.270002792 | 3.476813236  | 0.000507411 | 0.174931366 | up         |
| CCL2         | 1686.438647 | -2.215222925   | 0.637593636 | -3.474349176 | 0.000512094 | 0.174931366 | down       |
| S100A8       | 27.32945055 | -2.701345784   | 0.777607717 | -3.473918435 | 0.000512917 | NA          | down       |
| CYP1A1       | 160.1947662 | -2.619788196   | 0.755940558 | -3.465600791 | 0.000529048 | 0.175702781 | down       |
| RHOJ         | 613.1190672 | -1.017387222   | 0.295772668 | -3.439760777 | 0.000582229 | 0.188138508 | down       |
| SOCS3        | 872.8901328 | -1.374404393   | 0.402590318 | -3.413903242 | 0.000640393 | 0.201487905 | down       |
| ZNF367       | 122.5972361 | -0.771004796   | 0.226724943 | -3.400617444 | 0.000672338 | 0.206114841 | down       |
| ZNF213       | 405.4122695 | 0.540739015    | 0.160080888 | 3.377911146  | 0.000730387 | 0.211001929 | up         |
| ZNF436       | 1343.904538 | -1.302383716   | 0.385785273 | -3.375929068 | 0.000735669 | 0.211001929 | down       |
| CD93         | 1157.460239 | -2.240097254   | 0.663957084 | -3.373858505 | 0.000741225 | 0.211001929 | down       |
| EXOSC6       | 562.2297023 | 0.570603493    | 0.169937102 | 3.35773345   | 0.000785844 | 0.214932099 | up         |
| TGM2         | 1303.208826 | -2.024361916   | 0.603984698 | -3.351677486 | 0.000803235 | 0.214932099 | down       |
| HKDC1        | 131.7487337 | 2.348666598    | 0.701155167 | 3.349710176  | 0.000808962 | 0.214932099 | up         |
| LOC100287015 | 40.88701543 | -0.720844041   | 0.217012353 | -3.321672847 | 0.000894795 | NA          | down       |
| TFPI2        | 220.7361122 | -1.820005468   | 0.549455193 | -3.312381961 | 0.000925052 | 0.23464676  | down       |
| PARP6        | 1245.405129 | 0.580339577    | 0.175488533 | 3.306994296  | 0.000943028 | 0.23464676  | up         |
| ZNF205       | 256.8796368 | 0.579945649    | 0.175843627 | 3.298076011  | 0.000973498 | 0.23464676  | up         |
| DLL4         | 245.6145378 | -1.757148405   | 0.533601945 | -3.292994756 | 0.000991263 | 0.23464676  | down       |
| C22orf23     | 606.4132535 | 1.310984578    | 0.398216788 | 3.292137897  | 0.000994288 | 0.23464676  | up         |
