# Supplementary material for: Exploring Regorafenib Responsiveness and Uncovering Molecular Mechanisms in Recurrent Glioblastoma Tumors through Longitudinal In Vitro Sampling
Source: MDPI journal article supplement (doi:10.3390/cells13060487), 2024-03-11
Supplement: s1 [file s1]

**Supplementary Table S4.** Reactome pathways of Differentially Expressed Genes among Regorafenib treated and controls in Responders GB-EXPs samples.

| Pathway name                                                                     | Entities found | Entities Total | Entities ratio | Entities pValue | Entities FDR | Reactions found | Reactions total | Reactions ratio | Responders (treated vs ctrl) |
|----------------------------------------------------------------------------------|----------------|----------------|----------------|-----------------|--------------|-----------------|-----------------|-----------------|------------------------------|
| ERKs are inactivated                                                             | <u>1</u>       | 15             | 0.001          | 1.00E-05        | 1.45E-04     | 1               | 2               | 0               | ▲▲                           |
| ERK/MAPK targets                                                                 | <u>1</u>       | 26             | 0.002          | 1.00E-05        | 1.45E-04     | 1               | 7               | 0               | ▲▲                           |
| RAF-independent MAPK1/3 activation                                               | <u>1</u>       | 28             | 0.002          | 1.00E-05        | 1.45E-04     | 1               | 12              | 0.001           | ▲▲                           |
| MAPK targets/ Nuclear events mediated by MAP kinases                             | <u>1</u>       | 35             | 0.002          | 1.00E-05        | 1.45E-04     | 1               | 16              | 0.001           | ▲▲                           |
| Negative regulation of MAPK pathway                                              | <u>1</u>       | 49             | 0.003          | 1.00E-05        | 1.45E-04     | 1               | 17              | 0.001           | ▲▲                           |
| MAP kinase activation                                                            | <u>1</u>       | 69             | 0.005          | 1.00E-05        | 1.45E-04     | 1               | 32              | 0.002           | ▲▲                           |
| Interleukin-17 signaling                                                         | <u>1</u>       | 78             | 0.005          | 1.00E-05        | 1.45E-04     | 1               | 35              | 0.002           | ▲▲                           |
| RAF/MAP kinase cascade                                                           | <u>2</u>       | 322            | 0.021          | 1.00E-05        | 1.45E-04     | 2               | 75              | 0.005           | ▲▲                           |
| MAPK1/MAPK3 signaling                                                            | <u>2</u>       | 329            | 0.022          | 1.00E-05        | 1.45E-04     | 2               | 82              | 0.006           | ▲▲                           |
| Oncogenic MAPK signaling                                                         | <u>1</u>       | 93             | 0.006          | 1.00E-05        | 1.45E-04     | 1               | 46              | 0.003           | ▲▲                           |
| TRAF6 mediated induction of NFkB and MAP kinases upon TLR7/8 or 9 activation     | <u>1</u>       | 116            | 0.008          | 1.00E-05        | 1.45E-04     | 1               | 60              | 0.004           | ▲▲                           |
| MAPK family signaling cascades                                                   | <u>2</u>       | 380            | 0.025          | 1.00E-05        | 1.45E-04     | 2               | 122             | 0.009           | ▲▲                           |
| MyD88 cascade initiated on plasma membrane                                       | <u>1</u>       | 109            | 0.007          | 1.00E-05        | 1.45E-04     | 1               | 70              | 0.005           | ▲▲                           |
| TRIF(TICAM1)-mediated TLR4 signaling                                             | <u>1</u>       | 121            | 0.008          | 1.00E-05        | 1.45E-04     | 1               | 70              | 0.005           | ▲▲                           |
| Toll Like Receptor 10 (TLR10) Cascade                                            | <u>1</u>       | 109            | 0.007          | 1.00E-05        | 1.45E-04     | 1               | 71              | 0.005           | ▲▲                           |
| Toll Like Receptor 5 (TLR5) Cascade                                              | <u>1</u>       | 109            | 0.007          | 1.00E-05        | 1.45E-04     | 1               | 71              | 0.005           | ▲▲                           |
| MyD88-independent TLR4 cascade                                                   | <u>1</u>       | 121            | 0.008          | 1.00E-05        | 1.45E-04     | 1               | 72              | 0.005           | ▲▲                           |
| Toll Like Receptor 3 (TLR3) Cascade                                              | <u>1</u>       | 116            | 0.008          | 1.00E-05        | 1.45E-04     | 1               | 73              | 0.005           | ▲▲                           |
| MyD88 dependent cascade initiated on endosome                                    | <u>1</u>       | 117            | 0.008          | 1.00E-05        | 1.45E-04     | 1               | 75              | 0.005           | ▲▲                           |
| Toll Like Receptor 7/8 (TLR7/8) Cascade                                          | <u>1</u>       | 118            | 0.008          | 1.00E-05        | 1.45E-04     | 1               | 79              | 0.006           | ▲▲                           |
| Toll Like Receptor 9 (TLR9) Cascade                                              | <u>1</u>       | 121            | 0.008          | 1.00E-05        | 1.45E-04     | 1               | 80              | 0.006           | ▲▲                           |
| Diseases of signal transduction by growth factor receptors and second messengers | <u>3</u>       | 498            | 0.033          | 1.80E-02        | 2.50E-01     | 25              | 478             | 0.033           | ▲                            |
| Signaling by Receptor Tyrosine Kinases                                           | <u>9</u>       | 623            | 0.041          | 2.30E-02        | 3.07E-01     | 100             | 746             | 0.052           | ▲▲                           |
| Nuclear Events (kinase and transcription factor activation)                      | <u>5</u>       | 80             | 0.005          | 4.10E-02        | 4.86E-01     | 14              | 48              | 0.003           | ▲▲                           |
| Signaling by NTRK1 (TRKA)                                                        | <u>5</u>       | 143            | 0.009          | 4.10E-02        | 4.86E-01     | 14              | 102             | 0.007           | ▲▲                           |
| Signaling by NTRKs                                                               | <u>5</u>       | 166            | 0.011          | 4.10E-02        | 4.86E-01     | 14              | 164             | 0.011           | ▲▲                           |
