# Supplementary material for: Exploring Regorafenib Responsiveness and Uncovering Molecular Mechanisms in Recurrent Glioblastoma Tumors through Longitudinal In Vitro Sampling
Source: MDPI journal article supplement (doi:10.3390/cells13060487), 2024-03-11
Supplement: s1 [file s1]

**Supplementary Table S3.** Differentially Expressed Genes among Regorafenib treated and controls in Non Responders GB-EXPs samples.

| Gene     | baseMean    | log2FoldChange | lfcSE    | stat     | pvalue   | padj        | Regulation |
|----------|-------------|----------------|----------|----------|----------|-------------|------------|
| MKI67    | 577.6869245 | -4.22796691    | 0.695351 | -6.08033 | 1.20E-09 | 2.56E-05    | down       |
| TOP2A    | 641.8904594 | -3.619006931   | 0.809008 | -4.47339 | 7.70E-06 | 0.061511616 | down       |
| CASC5    | 250.7372044 | -3.234736383   | 0.745442 | -4.33935 | 1.43E-05 | 0.061511616 | down       |
| BIRC5    | 123.3057132 | -3.568481032   | 0.822436 | -4.33892 | 1.43E-05 | 0.061511616 | down       |
| HJURP    | 117.0095012 | -3.688975215   | 0.853645 | -4.32144 | 1.55E-05 | 0.061511616 | down       |
| KIF18B   | 123.3869476 | -3.683588732   | 0.857212 | -4.29718 | 1.73E-05 | 0.061511616 | down       |
| CCL7     | 12.15598713 | -6.991931175   | 1.72184  | -4.06073 | 4.89E-05 | 0.143992438 | down       |
| NDC80    | 53.1565635  | -3.478099681   | 0.869127 | -4.00183 | 6.29E-05 | 0.143992438 | down       |
| MOCOS    | 94.3891931  | 2.324618091    | 0.584021 | 3.980366 | 6.88E-05 | 0.143992438 | up         |
| NUF2     | 54.58216328 | -2.664170168   | 0.671068 | -3.97004 | 7.19E-05 | 0.143992438 | down       |
| NEK2     | 40.14613204 | -3.298374363   | 0.832445 | -3.96227 | 7.42E-05 | 0.143992438 | down       |
| MROH5    | 64.70807534 | -3.652838069   | 0.935541 | -3.90452 | 9.44E-05 | 0.167858458 | down       |
| HIST1H3G | 38.29670344 | -5.485509234   | 1.42629  | -3.846   | 0.00012  | 0.183637514 | down       |
| RRM2     | 171.1417248 | -3.529479473   | 0.917916 | -3.8451  | 0.000121 | 0.183637514 | down       |
| IQGAP3   | 297.7613924 | -2.610891753   | 0.707047 | -3.69267 | 0.000222 | 0.296686936 | down       |
| HIST1H3C | 49.49353902 | -3.322823526   | 0.900006 | -3.692   | 0.000222 | 0.296686936 | down       |
| INHBB    | 201.66417   | -2.40361943    | 0.654143 | -3.67446 | 0.000238 | 0.299135967 | down       |
| FAM64A   | 33.76801197 | -3.362778599   | 0.91907  | -3.65889 | 0.000253 | 0.300239476 | down       |
| KIF2C    | 134.1409627 | -2.582654225   | 0.712757 | -3.62347 | 0.000291 | 0.318428171 | down       |
| FUCA1    | 1522.267364 | -2.885756273   | 0.797921 | -3.6166  | 0.000299 | 0.318428171 | down       |
| FOXM1    | 173.5181152 | -1.941039219   | 0.543807 | -3.56935 | 0.000358 | 0.355617559 | down       |
| ANKRD1   | 12.49935044 | 3.031102022    | 0.850727 | 3.562956 | 0.000367 | 0.355617559 | up         |
| TRIB3    | 1188.796628 | 2.561106621    | 0.726689 | 3.524349 | 0.000425 | 0.39379262  | up         |
| ADAMTS4  | 1943.209037 | -2.945731879   | 0.841239 | -3.50166 | 0.000462 | 0.401536278 | down       |
| TIMP1    | 3530.528891 | -2.774024281   | 0.793257 | -3.497   | 0.000471 | 0.401536278 | down       |
| ADAMTS12 | 263.5787597 | -2.991143026   | 0.858622 | -3.48365 | 0.000495 | 0.405872723 | down       |
| CASS4    | 56.37722042 | 3.162495154    | 0.910874 | 3.471935 | 0.000517 | 0.408306131 | up         |
| PCDH12   | 552.3489498 | -2.295062687   | 0.664607 | -3.45326 | 0.000554 | 0.416925999 | down       |
| COL5A3   | 2706.82181  | -2.994533799   | 0.86872  | -3.44706 | 0.000567 | 0.416925999 | down       |
| CYTL1    | 45.45230986 | -3.956604456   | 1.161088 | -3.40767 | 0.000655 | 0.464903135 | down       |
| SKA1     | 44.05699295 | -2.227608081   | 0.655308 | -3.39933 | 0.000676 | 0.464903135 | down       |
| ASPM     | 509.4167206 | -3.196657133   | 0.963774 | -3.31681 | 0.000911 | 0.607052102 | down       |
| MCM10    | 39.33890565 | -2.313319127   | 0.70197  | -3.29547 | 0.000983 | 0.63438137  | down       |
